# Supplementary material
Source: ML conference proceedings conference paper supplement (https://openaccess.thecvf.com/content/WACV2023/html/Jacob_Online_Knowledge_Distillation_WACV_2023_paper.html)
Supplement: Supplementary file 1 [file Jacob_Online_Knowledge_Distillation_WACV_2023_supplemental.pdf]

# Online Knowledge Distillation for Multi-task Learning

## Supplemental Material

Geethu Miriam Jacob      Vishal Agarwal      Björn Stenger

Rakuten Institute of Technology, Rakuten Group, Inc.  
{geethu.jacob, vishal.agarwal, bjorn.stenger}@rakuten.com

### 1. Detailed Experiments

**Table 1: Ablation study on AFD component.** This is a detailed table for table 5 from main document. We compare models with different configurations of AFD: AFD for last layer only (AFD-last layer), equal weighting (AFD-equal), softmax weighting (AFD-softmax), select/skip policy (AFD-select/skip) and the proposed random initialization (AFD-ours) for knowledge distillation on intermediate features

| Method          | Sem. Segm.      |                 | Depth estimation |                  | Surface Normal Prediction |                     |                 |                   |                 |                     |
|-----------------|-----------------|-----------------|------------------|------------------|---------------------------|---------------------|-----------------|-------------------|-----------------|---------------------|
|                 | mIoU $\uparrow$ | pAcc $\uparrow$ | abs $\downarrow$ | rel $\downarrow$ | mean $\downarrow$         | median $\downarrow$ | <11° $\uparrow$ | <22.5° $\uparrow$ | <30° $\uparrow$ | $\Delta$ $\uparrow$ |
| AFD-last layer  | 50.41           | 73.25           | 0.4164           | 0.1749           | 31.91                     | 21.60               | 33.67           | 54.56             | 63.00           | 4.89                |
| AFD-equal       | 51.11           | 73.15           | 0.4145           | 0.1740           | 31.87                     | 21.55               | 33.58           | 54.65             | 63.12           | 5.28                |
| AFD-softmax     | 51.18           | 73.4            | 0.4163           | 0.1614           | 31.78                     | 21.40               | 33.68           | 54.51             | 62.97           | 5.68                |
| AFD-select/skip | 51.29           | 73.65           | 0.4133           | 0.1746           | 32.42                     | 22.51               | 32.12           | 53.14             | 61.76           | 4.39                |
| AFD-ours        | 51.99           | 73.75           | 0.4112           | 0.1701           | 31.82                     | 21.50               | 33.58           | 54.74             | 63.20           | <b>6.22</b>         |

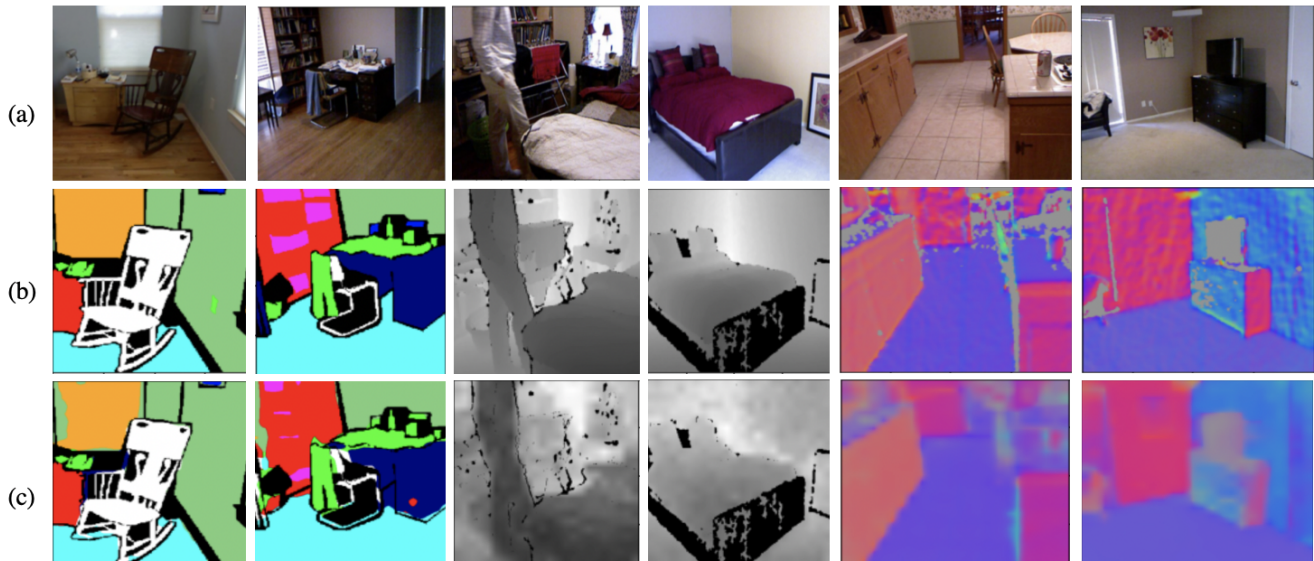

**Figure 1: Qualitative results.** Inferences of semantic segmentation, depth estimation and surface normal estimation on NYUv2 dataset (a) Input image, (b) groundtruth images, (c) predicted images.

**Table 2: Comparison with implemented SOTA on 3-task NYUv2 dataset with DeeplabV3 backbone.** Performance evaluation of state-of-the-art methods and the proposed method, implemented on DeeplabV3 architecture. The last column shows the average performance improvement. This is a detailed table of Table 3 (left) in main document.

| Method           | Sem. Segm.      |                 | Depth estimation |                  | Surface Normal Prediction |                        |                      |                   |                     | $\Delta \uparrow$ |
|------------------|-----------------|-----------------|------------------|------------------|---------------------------|------------------------|----------------------|-------------------|---------------------|-------------------|
|                  | mIoU $\uparrow$ | pAcc $\uparrow$ | abs $\downarrow$ | rel $\downarrow$ | $<11^\circ \uparrow$      | $<22.5^\circ \uparrow$ | $<30^\circ \uparrow$ | mean $\downarrow$ | median $\downarrow$ |                   |
| Single Task      | 49.57           | 72.88           | 0.5052           | 0.1962           | 25.23                     | 48.99                  | 63.23                | 27.15             | 22.11               | 0.15              |
| Baseline (MTL)   | 48.11           | 72.38           | 0.4792           | 0.1859           | 24.67                     | 47.99                  | 60.48                | 28.63             | 23.60               | 0                 |
| DWA [1]          | 48.21           | 72.29           | 0.4703           | 0.1817           | 24.76                     | 48.14                  | 60.69                | 28.54             | 23.54               | 0.81              |
| GradNorm [2]     | 48.14           | 72.49           | 0.4816           | 0.1842           | 24.65                     | 48.07                  | 60.52                | 28.54             | 23.59               | 0.14              |
| UW [3]           | 48.17           | 72.39           | 0.4773           | 0.1844           | 24.85                     | 48.32                  | 60.75                | 28.52             | 23.43               | 0.42              |
| RLW [4]          | 48.39           | 72.43           | 0.4756           | 0.1871           | 24.76                     | 48.17                  | 60.55                | 28.67             | 23.57               | 0.18              |
| Cross Stitch [5] | 48.20           | 72.86           | 0.4789           | 0.1834           | 24.20                     | 47.64                  | 60.23                | 28.57             | 23.87               | 0.11              |
| KD-MTL [6]       | 48.78           | 73.07           | 0.4605           | 0.1841           | 25.43                     | 49.02                  | 61.62                | 28.08             | 23.04               | 1.96              |
| Ours             | 49.06           | 72.91           | 0.4880           | 0.1883           | 26.86                     | 51.91                  | 64.32                | 27.04             | 21.52               | <b>2.45</b>       |

**Table 3: Comparison with implemented SOTA on 3-task NYUv2 dataset with DeeplabV3-MTAN backbone.** Performance evaluation of state-of-the-art methods and the proposed method, implemented on MTAN-DeeplabV3 architecture. The last column shows the average performance improvement (full table of Table 3 (right) in main document).

| Method         | Sem. Segm.      |                 | Depth estimation |                  | Surface Normal Prediction |                     |                      |                        |                      | $\Delta \uparrow$ |
|----------------|-----------------|-----------------|------------------|------------------|---------------------------|---------------------|----------------------|------------------------|----------------------|-------------------|
|                | mIoU $\uparrow$ | pAcc $\uparrow$ | abs $\downarrow$ | rel $\downarrow$ | mean $\downarrow$         | median $\downarrow$ | $<11^\circ \uparrow$ | $<22.5^\circ \uparrow$ | $<30^\circ \uparrow$ |                   |
| Single Task    | 48.69           | 72.87           | 0.6228           | 0.2344           | 26.41                     | 21.07               | 27.65                | 52.88                  | 65.32                | 0.15              |
| Baseline (MTL) | 46.25           | 72.01           | 0.5314           | 0.2151           | 28.30                     | 23.72               | 23.88                | 47.93                  | 60.69                | 0                 |
| DWA [1]        | 46.58           | 72.23           | 0.5337           | 0.2079           | 27.79                     | 23.10               | 24.47                | 48.98                  | 61.91                | 1.39              |
| GradNorm [2]   | 46.76           | 72.26           | 0.5304           | 0.2072           | 27.81                     | 23.11               | 24.57                | 48.97                  | 61.89                | 1.64              |
| UW [3]         | 46.72           | 72.05           | 0.5351           | 0.2136           | 28.23                     | 23.62               | 24.20                | 48.08                  | 60.89                | 0.36              |
| RLW [4]        | 46.24           | 71.64           | 0.5371           | 0.2050           | 28.03                     | 23.57               | 23.85                | 47.37                  | 60.21                | 0.48              |
| KD-MTL [6]     | 47.35           | 72.50           | 0.5148           | 0.2031           | 27.66                     | 22.94               | 25.18                | 49.30                  | 62.14                | 3.04              |
| OKD-MTL (ours) | 48.30           | 72.58           | 0.4957           | 0.1971           | 27.36                     | 22.33               | 25.88                | 50.50                  | 63.15                | <b>5.18</b>       |
